# Supplementary material for: Exploration of the potential energy surface in mixed Zintl clusters applying an automatic Johnson polyhedra generator: the case of arachno E6M24− (E = Si, Ge, Sn; M = Sb, Bi)
Source: Royal Society of Chemistry journal article supplement (doi:10.1039/d3ra04308h), 2023-01-01
Supplement: d3ra04308h1.pdf [file d3ra04308h1.pdf]

## Supporting Information

### Exploration of the potential energy surface in mixed Zintl Clusters applying an automatic Johnson Polyhedra generator: The case of Arachno $E_6M_2^{4-}$ (E = Si, Ge, Sn; M = Sb, Bi)

Rodrigo Báez-Grez,<sup>\*a</sup> Diego Inostroza,<sup>a,b</sup> Alejandro Vásquez-Espinal,<sup>\*c</sup> Rafael Islas<sup>\*a,d</sup> and Ricardo Pino-Rios<sup>\*c,e</sup>

<sup>a</sup>. Departamento de Ciencias Químicas, Facultad de Ciencias Exactas, Universidad Andres Bello. República 275, Santiago, Chile, 8370146. E-mail: r.baez@uandresbello.edu

<sup>b</sup>. Doctorado en Fisicoquímica Molecular, Facultad de Ciencias Exactas, Universidad Andres Bello, República 275, Santiago, Chile.

<sup>c</sup>. Química y Farmacia, Facultad de Ciencias de la Salud, Universidad Arturo Prat. Casilla 121, Iquique, Chile, 1100000. E-mail: alvasquez@unap.cl

<sup>d</sup>. Centro de Química Teórica & Computacional (CQT&C), Facultad de Ciencias Exactas, Universidad Andres Bello. República 275, Santiago, Chile, 8370146. E-mail: rafael.islas@unab.cl

<sup>e</sup>. Instituto de Estudios de la Salud, Universidad Arturo Prat. Casilla 121, Iquique, Chile, 1100000. E-mail: rpinorios@unap.cl

**Figure S1.** Isosurface and contour plot for  $B_z^{ind}$  and the external field (NICS<sub>zz</sub>). The isosurface value is set to  $\pm 3,0$  ppm. Blue: long range shielding regions; Red: deshielding regions. PBE0/def2-TZVP.

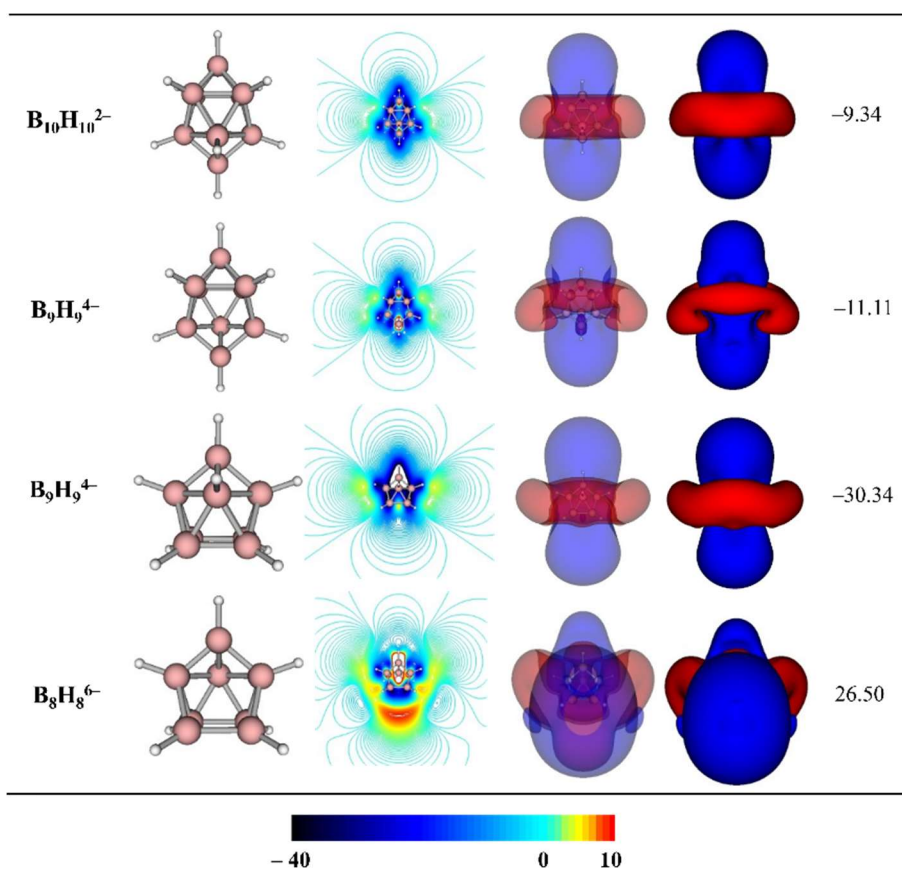

**Table S1.** Lower energy structures in the singlet state below 10 kcal·mol<sup>-1</sup> for the systems studied, with their respective coordinates. In addition the energy (kcal·mol<sup>-1</sup>) at the PBE0-D3/Def2TZVP (PCM,Solvent=Water) level and in bold DLPNO-CCSD(T) def2-QZVPP/C CPCM(water).

| <b>Si<sub>6</sub>Sb<sub>2</sub><sup>4-</sup></b>                                    |    |              |              |              |      |
|-------------------------------------------------------------------------------------|----|--------------|--------------|--------------|------|
| 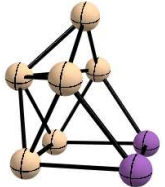   | Sb | 1.383577750  | 1.419815000  | -1.788756000 | 0.00 |
|                                                                                     | Sb | 1.383577750  | -1.419815000 | -1.788756000 |      |
|                                                                                     | Si | -1.303477250 | -1.249460000 | -1.788756000 |      |
|                                                                                     | Si | -1.303477250 | 1.249460000  | -1.788756000 |      |
|                                                                                     | Si | -0.040050250 | 0.000000000  | 1.788756000  |      |
|                                                                                     | Si | -0.096197250 | -1.875011000 | 0.323650000  |      |
|                                                                                     | Si | -1.876266250 | 0.000000000  | 0.245938000  |      |
|                                                                                     | Si | -0.096197250 | 1.875011000  | 0.323650000  |      |
|    | Sb | 0.099144580  | 0.084714330  | 1.846922572  | 3.81 |
|                                                                                     | Si | -0.191745784 | 2.025139370  | 0.105584114  |      |
|                                                                                     | Si | -1.405872548 | 1.171902703  | -1.848297291 |      |
|                                                                                     | Si | -1.953003119 | -0.053007702 | 0.201878910  |      |
|                                                                                     | Sb | 1.264349813  | 1.245113878  | -1.922045991 |      |
|                                                                                     | Si | -1.349004919 | -1.364527591 | -1.760213448 |      |
|                                                                                     | Si | 0.065836433  | -1.948440532 | 0.178708751  |      |
|                                                                                     | Si | 1.093949332  | -1.391346312 | -1.857133560 |      |
|    | Sb | -0.188282512 | 2.037353220  | 1.714808132  | 4.09 |
|                                                                                     | Si | -1.691826889 | -0.124064774 | 1.915917996  |      |
|                                                                                     | Sb | 0.113860318  | -2.040561927 | 1.717547155  |      |
|                                                                                     | Si | -1.637605286 | 1.120821066  | -0.285942090 |      |
|                                                                                     | Si | -1.454513304 | -1.350306793 | -0.284282302 |      |
|                                                                                     | Si | 1.655753269  | -1.043976779 | -0.179461776 |      |
|                                                                                     | Si | 1.483834182  | 1.276354461  | -0.181020278 |      |
|                                                                                     | Si | 0.037211097  | 0.001604353  | -1.716177643 |      |
|   | Si | -0.331722000 | -0.031426000 | -1.919178000 | 5.43 |
|                                                                                     | Sb | -2.016154000 | -0.645360000 | 0.103100000  |      |
|                                                                                     | Si | -1.370476000 | 1.792461000  | -0.604921000 |      |
|                                                                                     | Si | 1.173888000  | 1.700534000  | -0.980955000 |      |
|                                                                                     | Si | 0.196552000  | 2.696781000  | 0.942367000  |      |
|                                                                                     | Sb | 1.733989000  | -0.913715000 | -0.335516000 |      |
|                                                                                     | Si | 0.039711000  | -1.236992000 | 1.658215000  |      |
|                                                                                     | Si | 1.319931000  | 0.758129000  | 1.751129000  |      |
|  | Sb | -1.510894000 | -1.045314000 | -0.182058000 | 6.63 |
|                                                                                     | Si | 0.000048000  | -0.244274000 | 2.007229000  |      |
|                                                                                     | Si | -1.691746000 | 1.249148000  | 1.076577000  |      |
|                                                                                     | Sb | 1.510818000  | -1.045408000 | -0.182070000 |      |
|                                                                                     | Si | 1.691813000  | 1.249057000  | 1.076591000  |      |
|                                                                                     | Si | 0.000142000  | 2.729911000  | 0.101935000  |      |
|                                                                                     | Si | -1.207196000 | 1.316222000  | -1.467866000 |      |
|                                                                                     | Si | 1.207217000  | 1.316135000  | -1.468000000 |      |
|  | Sb | -1.981951000 | 0.314565000  | 0.000000000  | 7.34 |
|                                                                                     | Si | -0.256904000 | 1.957799000  | 1.256365000  |      |
|                                                                                     | Si | -0.256904000 | 1.957799000  | -1.256365000 |      |
|                                                                                     | Si | -0.256904000 | -0.447502000 | 1.946329000  |      |
|                                                                                     | Si | 1.820889000  | 0.757311000  | 1.256426000  |      |
|                                                                                     | Si | 1.820889000  | 0.757311000  | -1.256426000 |      |
|                                                                                     | Si | -0.256904000 | -0.447502000 | -1.946329000 |      |
|                                                                                     | Sb | 1.264338000  | -1.559526000 | 0.000000000  |      |
|  | Si | 0.113143000  | -0.365500000 | -2.014898000 | 7.52 |
|                                                                                     | Si | 1.464263000  | -1.857283000 | -0.547854000 |      |
|                                                                                     | Sb | -1.037959000 | -1.437988000 | 0.259923000  |      |
|                                                                                     | Sb | -1.065423000 | 1.418209000  | -0.260187000 |      |
|                                                                                     | Si | 2.273050000  | 0.367027000  | -1.186522000 |      |
|                                                                                     | Si | 0.104223000  | 0.366705000  | 2.014216000  |      |
|                                                                                     | Si | 1.428764000  | 1.884523000  | 0.548088000  |      |
|                                                                                     | Si | 2.278877000  | -0.323418000 | 1.187933000  |      |
|  | Si | 0.107634000  | -0.366072000 | 2.014220000  | 7.52 |
|                                                                                     | Si | 1.442164000  | -1.874192000 | 0.547973000  |      |
|                                                                                     | Si | 2.276975000  | 0.340110000  | 1.187579000  |      |
|                                                                                     | Sb | -1.048454000 | 1.430648000  | 0.259884000  |      |
|                                                                                     | Sb | -1.055147000 | -1.425873000 | -0.259954000 |      |
|                                                                                     | Si | 2.275509000  | -0.350756000 | -1.186892000 |      |
|                                                                                     | Si | 1.450593000  | 1.867618000  | -0.547964000 |      |
|                                                                                     | Si | 0.110244000  | 0.365899000  | -2.014659000 |      |
|  | Si | 0.107634000  | -0.366072000 | 2.014220000  | 5.67 |
|                                                                                     | Si | 1.442164000  | -1.874192000 | 0.547973000  |      |
|                                                                                     | Si | 2.276975000  | 0.340110000  | 1.187579000  |      |
|                                                                                     | Sb | -1.048454000 | 1.430648000  | 0.259884000  |      |
|                                                                                     | Sb | -1.055147000 | -1.425873000 | -0.259954000 |      |
|                                                                                     | Si | 2.275509000  | -0.350756000 | -1.186892000 |      |
|                                                                                     | Si | 1.450593000  | 1.867618000  | -0.547964000 |      |
|                                                                                     | Si | 0.110244000  | 0.365899000  | -2.014659000 |      |

|                                                                                   |             |              |              |              |      |
|-----------------------------------------------------------------------------------|-------------|--------------|--------------|--------------|------|
| 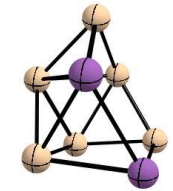 | Sb          | -1.778158000 | -0.459141000 | -0.194476000 | 7.81 |
|                                                                                   | Si          | -0.187173000 | -0.149822000 | 1.981644000  |      |
|                                                                                   | Si          | -0.226293000 | 2.200704000  | 1.176682000  |      |
|                                                                                   | Si          | -1.302882000 | 1.978026000  | -1.011928000 | 8.02 |
|                                                                                   | Sb          | 0.803128000  | -1.590779000 | -0.125414000 |      |
|                                                                                   | Si          | 1.857176000  | 0.997680000  | 1.140353000  |      |
|                                                                                   | Si          | 1.043657000  | 2.194205000  | -1.005044000 |      |
| Si                                                                                | 2.367412000 | 0.246775000  | -1.116394000 |              |      |

|                                                                                   |             |              |              |              |      |
|-----------------------------------------------------------------------------------|-------------|--------------|--------------|--------------|------|
| 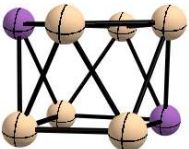 | Sb          | -2.093481000 | -0.459934000 | -0.122534000 | 9.19 |
|                                                                                   | Si          | -0.104650000 | -1.344843000 | 1.370872000  |      |
|                                                                                   | Si          | -0.792920000 | 0.983701000  | 1.764092000  |      |
|                                                                                   | Si          | 0.104648000  | -1.344791000 | -1.370921000 | 6.64 |
|                                                                                   | Sb          | 2.093446000  | -0.459980000 | 0.122528000  |      |
|                                                                                   | Si          | 1.034241000  | 2.036658000  | 0.587797000  |      |
|                                                                                   | Si          | -1.034203000 | 2.036609000  | -0.587734000 |      |
| Si                                                                                | 0.793012000 | 0.983784000  | -1.764087000 |              |      |

|                                                                                   |              |              |              |              |      |
|-----------------------------------------------------------------------------------|--------------|--------------|--------------|--------------|------|
| 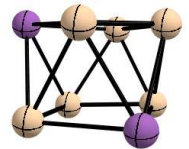 | Si           | 0.792868000  | 0.983761000  | 1.764032000  | 9.19 |
|                                                                                   | Si           | 1.034322000  | 2.036614000  | -0.587613000 |      |
|                                                                                   | Si           | -1.034290000 | 2.036599000  | 0.587613000  |      |
|                                                                                   | Sb           | 2.093484000  | -0.459955000 | -0.122510000 | 6.17 |
|                                                                                   | Si           | -0.792847000 | 0.983761000  | -1.764034000 |      |
|                                                                                   | Sb           | -2.093495000 | -0.459937000 | 0.122504000  |      |
|                                                                                   | Si           | 0.104613000  | -1.344839000 | 1.370875000  |      |
| Si                                                                                | -0.104625000 | -1.344858000 | -1.370849000 |              |      |

**Si<sub>6</sub>Bi<sub>2</sub><sup>4-</sup>**

|                                                                                    |              |              |              |              |      |
|------------------------------------------------------------------------------------|--------------|--------------|--------------|--------------|------|
| 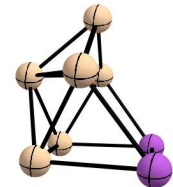 | Bi           | 1.454089440  | 1.503453000  | -1.801919477 | 0.00 |
|                                                                                    | Bi           | 1.454089440  | -1.503453000 | -1.801919477 |      |
|                                                                                    | Si           | -1.319510427 | -1.247278000 | -1.783371677 |      |
|                                                                                    | Si           | -1.319510427 | 1.247278000  | -1.783371677 | 0.00 |
|                                                                                    | Si           | -0.067289506 | 0.000000000  | 1.792645577  |      |
|                                                                                    | Si           | -0.163542401 | -1.886406000 | 0.344750481  |      |
|                                                                                    | Si           | -1.906749766 | 0.000000000  | 0.246134304  |      |
| Si                                                                                 | -0.163542401 | 1.886406000  | 0.344750481  |              |      |

|                                                                                     |             |              |              |              |      |
|-------------------------------------------------------------------------------------|-------------|--------------|--------------|--------------|------|
| 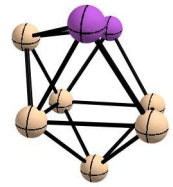 | Bi          | -0.283537000 | -0.687153000 | 1.959120000  | 5.99 |
|                                                                                     | Si          | -1.832827000 | 0.623113000  | -0.000000000 |      |
|                                                                                     | Bi          | -0.283537000 | -0.687153000 | -1.959120000 |      |
|                                                                                     | Si          | -0.283537000 | 1.961836000  | 1.347494000  | 3.51 |
|                                                                                     | Si          | -0.283537000 | 1.961836000  | -1.347494000 |      |
|                                                                                     | Si          | 2.069983000  | 0.501001000  | -1.189789000 |      |
|                                                                                     | Si          | 2.069983000  | 0.501001000  | 1.189789000  |      |
| Si                                                                                  | 1.621868000 | 2.598883000  | -0.000000000 |              |      |

|                                                                                     |             |              |              |              |      |
|-------------------------------------------------------------------------------------|-------------|--------------|--------------|--------------|------|
| 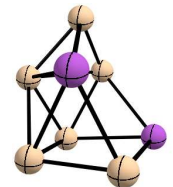 | Bi          | -2.184593000 | -0.433916000 | -0.277234000 | 6.66 |
|                                                                                     | Si          | -0.054736000 | -1.750522000 | 0.762949000  |      |
|                                                                                     | Si          | 0.778267000  | 0.007927000  | 2.202335000  |      |
|                                                                                     | Si          | -1.188750000 | 1.335492000  | 1.633191000  | 4.01 |
|                                                                                     | Bi          | 2.085699000  | -0.498775000 | -0.253081000 |      |
|                                                                                     | Si          | 0.898151000  | 2.218095000  | 0.846613000  |      |
|                                                                                     | Si          | -1.040622000 | 1.968527000  | -0.803309000 |      |
| Si                                                                                  | 1.193988000 | 1.750006000  | -1.497765000 |              |      |

|                                                                                     |              |              |              |              |      |
|-------------------------------------------------------------------------------------|--------------|--------------|--------------|--------------|------|
| 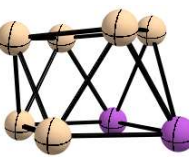 | Si           | -1.609517000 | -1.474633000 | 1.204856000  | 6.97 |
|                                                                                     | Si           | -3.057987000 | 0.051561000  | 0.000000000  |      |
|                                                                                     | Si           | -1.609517000 | -1.474633000 | -1.204856000 |      |
|                                                                                     | Si           | -1.609517000 | 1.083345000  | 1.683109000  | 4.84 |
|                                                                                     | Si           | -1.609517000 | 1.083345000  | -1.683109000 |      |
|                                                                                     | Bi           | 0.814511000  | -0.113707000 | -1.592943000 |      |
|                                                                                     | Bi           | 0.814511000  | -0.113707000 | 1.592943000  |      |
| Si                                                                                  | -0.161720000 | 2.079251000  | 0.000000000  |              |      |

|                                                                                     |             |              |              |              |      |
|-------------------------------------------------------------------------------------|-------------|--------------|--------------|--------------|------|
| 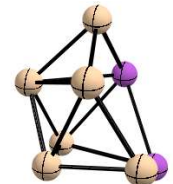 | Bi          | -1.476354000 | -0.898696000 | -0.085730000 | 7.43 |
|                                                                                     | Si          | -1.244476000 | 2.143682000  | 1.117172000  |      |
|                                                                                     | Si          | -0.036998000 | 2.737452000  | -1.055729000 |      |
|                                                                                     | Si          | -2.060456000 | 1.540758000  | -1.099657000 | 5.87 |
|                                                                                     | Si          | 0.014541000  | 0.217716000  | 2.039307000  |      |
|                                                                                     | Si          | 1.147701000  | 2.221866000  | 1.130283000  |      |
|                                                                                     | Si          | 2.022513000  | 1.606605000  | -1.063182000 |      |
| Bi                                                                                  | 1.502865000 | -0.867004000 | -0.094447000 |              |      |

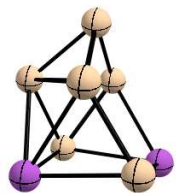

|    |              |              |              |
|----|--------------|--------------|--------------|
| Bi | -1.877552000 | -0.686237000 | -0.189730000 |
| Si | -1.201937000 | 1.099112000  | 1.849615000  |
| Si | -1.199731000 | 1.968453000  | -0.934090000 |
| Si | -0.019051000 | -0.953188000 | 1.776276000  |
| Si | -0.066895000 | 2.968984000  | 0.898674000  |
| Si | 1.363998000  | 1.972698000  | -0.719341000 |
| Si | 0.187026000  | 0.208171000  | -1.958519000 |
| Bi | 2.035531000  | -0.539055000 | 0.035795000  |

7.73

5.05

### Ge<sub>6</sub>Sb<sub>24</sub><sup>4-</sup>

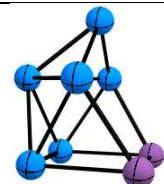

|    |              |              |              |
|----|--------------|--------------|--------------|
| Ge | 0.023415500  | 0.000000000  | 1.885793500  |
| Ge | -0.062010500 | -1.981044000 | 0.343793500  |
| Ge | -0.062010500 | 1.981044000  | 0.343793500  |
| Ge | -1.997286500 | 0.000000000  | 0.318286500  |
| Sb | 1.350791500  | -1.420509000 | -1.885793500 |
| Sb | 1.350791500  | 1.420509000  | -1.885793500 |
| Ge | -1.397622500 | 1.318185000  | -1.885793500 |
| Ge | -1.397622500 | -1.318185000 | -1.885793500 |

0.00

0.00

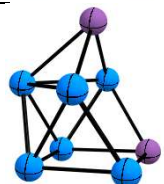

|    |              |              |              |
|----|--------------|--------------|--------------|
| Ge | 0.598449000  | 1.813404000  | 1.315277000  |
| Ge | 1.216729000  | -0.768666000 | 1.695957000  |
| Sb | 1.940656000  | -0.937275000 | -0.938437000 |
| Ge | 1.313786000  | 1.684432000  | -1.183086000 |
| Ge | -1.272352000 | 0.033989000  | 1.634093000  |
| Ge | -0.240387000 | -2.177322000 | 0.017698000  |
| Ge | -1.118069000 | 1.851383000  | -0.688457000 |
| Sb | -2.253225000 | -0.591962000 | -0.813082000 |

1.48

1.78

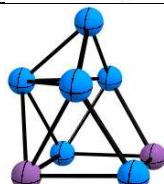

|    |              |              |              |
|----|--------------|--------------|--------------|
| Sb | 1.322350118  | 1.272645046  | -1.968838757 |
| Ge | 0.066084084  | 1.995470431  | 0.302016779  |
| Ge | 1.245927881  | -1.440841323 | -1.873707630 |
| Ge | -1.420362395 | 1.405056317  | -1.827988299 |
| Ge | 0.077632078  | 0.037279800  | 1.878518176  |
| Ge | 0.184712678  | -1.953357764 | 0.346833144  |
| Sb | -1.458443915 | -1.385979238 | -1.843538019 |
| Ge | -2.002827747 | 0.173427519  | 0.469875511  |

2.34

2.78

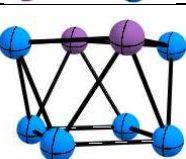

|    |              |              |              |
|----|--------------|--------------|--------------|
| Ge | 0.460542000  | 1.764981000  | 1.333565000  |
| Sb | 2.171897000  | 0.042398000  | 0.000000000  |
| Ge | 0.460542000  | 1.764981000  | -1.333565000 |
| Ge | -1.760147000 | 0.481106000  | 1.332740000  |
| Ge | 0.460542000  | -0.795724000 | 2.028020000  |
| Ge | 0.460542000  | -0.795724000 | -2.028020000 |
| Ge | -1.760147000 | 0.481106000  | -1.332740000 |
| Sb | -1.118954000 | -1.862462000 | 0.000000000  |

6.09

4.92

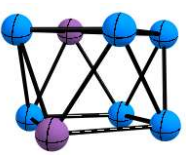

|    |              |              |              |
|----|--------------|--------------|--------------|
| Ge | -0.385291000 | -1.659014000 | -1.371440000 |
| Ge | -1.219037000 | 0.810177000  | -1.659863000 |
| Sb | 2.053180000  | -0.666996000 | -0.535914000 |
| Ge | 0.387033000  | -1.658893000 | 1.370539000  |
| Sb | -2.051938000 | -0.669824000 | 0.535810000  |
| Ge | 0.949929000  | 1.914721000  | -0.839503000 |
| Ge | 1.217901000  | 0.809953000  | 1.659948000  |
| Ge | -0.952513000 | 1.913612000  | 0.840484000  |

7.35

7.16

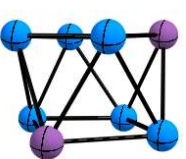

|    |              |              |              |
|----|--------------|--------------|--------------|
| Ge | 1.407423000  | 0.216218000  | -1.655076000 |
| Sb | -0.365621000 | 2.091847000  | -0.672158000 |
| Ge | 0.365621000  | 1.214032000  | 1.913167000  |
| Ge | 2.016992000  | -0.420969000 | 0.813161000  |
| Ge | -1.407423000 | -0.216218000 | -1.655076000 |
| Ge | -2.016992000 | 0.420969000  | 0.813161000  |
| Ge | -0.365621000 | -1.214032000 | 1.913167000  |
| Sb | 0.365621000  | -2.091847000 | -0.672158000 |

7.37

7.03

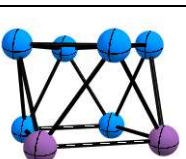

|    |              |              |              |
|----|--------------|--------------|--------------|
| Sb | 0.526363000  | -1.455783000 | 1.547124000  |
| Ge | -1.859115000 | -0.071650000 | 1.279295000  |
| Ge | -1.859115000 | -0.071650000 | -1.279295000 |
| Sb | 0.526363000  | -1.455783000 | -1.547124000 |
| Ge | 0.526363000  | 1.226232000  | 1.778282000  |
| Ge | -1.172389000 | 2.086234000  | -0.000000000 |
| Ge | 0.526363000  | 1.226232000  | -1.778282000 |
| Ge | 2.160111000  | 0.244910000  | 0.000000000  |

7.50

6.72

|    |              |              |              |
|----|--------------|--------------|--------------|
| Ge | -2.160944000 | -0.854395000 | -1.101131000 |
| Sb | 0.063170000  | -2.120296000 | -0.365351000 |
| Ge | -1.663400000 | -0.192715000 | 1.349246000  |
| Ge | -1.533401000 | 1.548283000  | -0.837793000 |
| Sb | 2.165500000  | -0.246700000 | -0.610737000 |

8.00

|                                                                                     |                                                                                                                                                                                                                                                                                                                                                             |  |                             |
|-------------------------------------------------------------------------------------|-------------------------------------------------------------------------------------------------------------------------------------------------------------------------------------------------------------------------------------------------------------------------------------------------------------------------------------------------------------|--|-----------------------------|
| 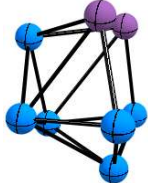   | Ge 0.925696000 -0.606268000 1.840206000<br>Ge -0.019931000 1.800604000 1.362340000<br>Ge 0.900036000 2.076893000 -1.057227000                                                                                                                                                                                                                               |  | <b>8.37</b>                 |
|    | Ge -1.947494000 1.177463000 -0.513788000<br>Ge -1.491207000 -0.980937000 1.204679000<br>Ge -0.428292000 1.440840000 1.636178000<br>Ge -1.957123000 -1.220910000 -1.266877000<br>Ge 0.413976000 -1.941864000 -0.967729000<br>Sb 1.272072000 -0.801697000 1.454150000<br>Ge 0.251756000 2.346860000 -0.703114000<br>Sb 1.964561000 0.286276000 -1.070997000   |  | <b>8.75</b><br><b>8.73</b>  |
|    | Ge 1.784914000 1.045849000 1.002910000<br>Sb 0.809131000 1.212893000 -1.556482000<br>Ge -1.784914000 1.186082000 -0.427962000<br>Ge -0.661224000 1.138797000 1.905695000<br>Ge 1.784914000 -1.186082000 -0.427962000<br>Sb -0.809131000 -1.212893000 -1.556482000<br>Ge -1.784914000 -1.045849000 1.002910000<br>Ge 0.661224000 -1.138797000 1.905695000    |  | <b>8.89</b><br><b>7.17</b>  |
|    | Ge -2.462659000 0.178948000 0.000000000<br>Sb -0.827807000 -0.409517000 2.021251000<br>Ge -0.652366000 2.010500000 0.000000000<br>Sb -0.827807000 -0.409517000 -2.021251000<br>Ge 1.438415000 1.088012000 1.305456000<br>Ge 1.438415000 1.088012000 -1.305456000<br>Ge 1.438415000 -1.530069000 -1.256271000<br>Ge 1.438415000 -1.530069000 1.256271000     |  | <b>9.20</b><br><b>30.36</b> |
| <b>Ge<sub>6</sub>Bi<sub>2</sub><sup>4-</sup></b>                                    |                                                                                                                                                                                                                                                                                                                                                             |  |                             |
|  | Ge -1.306505025 -1.317126375 -1.948698343<br>Ge -1.315102029 1.318384625 -1.941689500<br>Ge -2.035899104 -0.006846375 0.214599395<br>Bi 1.520652136 1.514666625 -1.835310942<br>Bi 1.529685426 -1.497479375 -1.844525250<br>Ge -0.114088939 -1.990219375 0.350533603<br>Ge -0.127191628 1.988034625 0.360417541<br>Ge -0.107182627 -0.004611375 1.892556009 |  | <b>0.00</b><br><b>0.00</b>  |
|  | Ge 0.088844679 2.076150677 0.173158315<br>Bi -0.017037327 -0.063635823 1.957333052<br>Ge -2.096104705 0.110884129 0.094452584<br>Ge 1.313284943 1.424181954 -1.889219966<br>Bi 1.424820400 -1.377195370 -1.914978350<br>Ge -0.285176198 -2.146240705 0.135802748<br>Ge -1.277577223 1.443897421 -1.985147450<br>Ge -1.392378812 -1.236340714 -2.039986441   |  | <b>3.27</b><br><b>3.19</b>  |
|  | Bi 1.224482548 -1.384371808 -2.072229661<br>Ge -1.615544531 -1.273785307 -1.773722827<br>Ge 1.391502179 1.403388123 -1.836916131<br>Ge -0.123941422 -2.004724014 0.275224282<br>Bi -1.380777254 1.609690450 -1.852783880<br>Ge 0.387624799 1.919894916 0.403304459<br>Ge -2.011302542 0.005091142 0.513441170<br>Ge 0.095084265 -0.088730365 1.883913125    |  | <b>3.78</b><br><b>3.91</b>  |
|  | Ge -0.173699267 1.967571985 0.328224944<br>Ge -0.201267068 0.064982481 1.932899456<br>Bi 1.601649981 1.477180633 -1.755440589<br>Ge -2.042235584 -0.026135647 0.155695495<br>Ge -1.209001769 1.071334242 -2.006010118<br>Ge 1.489868198 -1.286524785 -2.020560994<br>Bi 0.503588551 -2.123654912 0.390394507<br>Ge -1.077448136 -1.521920014 -1.949586124   |  | <b>3.98</b><br><b>3.86</b>  |
|                                                                                     | Ge -2.055181000 -1.230014000 -1.202322000<br>Ge -1.993512000 -0.373026000 1.238465000<br>Ge -0.892674000 1.955042000 1.290768000<br>Ge -2.044523000 1.256379000 -1.032207000<br>Bi 0.372407000 -1.990078000 -0.172540000                                                                                                                                    |  | <b>7.92</b>                 |

|                                                                                     |                                                                                                                                                                                                                                                                                                                                                            |  |                            |
|-------------------------------------------------------------------------------------|------------------------------------------------------------------------------------------------------------------------------------------------------------------------------------------------------------------------------------------------------------------------------------------------------------------------------------------------------------|--|----------------------------|
| 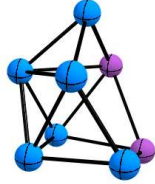   | Ge 0.542115000 -0.112142000 2.033408000<br>Ge 0.176521000 2.391855000 -1.043071000<br>Bi 2.043884000 0.491053000 -0.322898000                                                                                                                                                                                                                              |  | <b>5.47</b>                |
|    | Bi -1.253589000 -1.774736000 -0.000000000<br>Bi 2.161567000 0.208774000 -0.000000000<br>Ge 0.343637000 -0.589062000 2.086531000<br>Ge 0.343637000 -0.589062000 -2.086531000<br>Ge 0.343637000 1.950804000 1.338286000<br>Ge -1.864808000 0.669115000 1.337758000<br>Ge -1.864808000 0.669115000 -1.337758000<br>Ge 0.343637000 1.950804000 -1.338286000    |  | <b>8.18</b><br><b>6.43</b> |
|    | Ge -0.945297000 0.125480000 -2.131808000<br>Ge -0.164392000 2.328254000 -0.990357000<br>Bi 1.784330000 1.021266000 0.541283000<br>Bi 0.957302000 -1.561177000 -0.719394000<br>Ge 0.253076000 -0.835847000 1.983937000<br>Ge -1.854998000 -1.451383000 -0.164194000<br>Ge -2.284026000 1.300877000 -0.172099000<br>Ge -2.115470000 -0.066984000 1.936497000 |  | <b>8.71</b><br><b>6.84</b> |
|    | Ge -1.335756000 -2.058064000 -0.295477000<br>Ge -2.202820000 -0.180349000 1.304723000<br>Ge -2.202742000 0.180345000 -1.304770000<br>Bi 1.327445000 -1.448367000 0.484595000<br>Ge 0.095463000 0.703331000 2.058190000<br>Ge -1.335760000 2.058060000 0.295441000<br>Ge 0.095550000 -0.703422000 -2.058185000<br>Bi 1.327424000 1.448405000 -0.484565000   |  | <b>9.15</b><br><b>5.42</b> |
|   | Bi 0.375858000 2.198419000 -0.574563000<br>Ge -0.375858000 1.199477000 2.081809000<br>Ge 2.015083000 0.404235000 0.940908000<br>Ge -1.423805000 0.200287000 -1.532445000<br>Ge 0.375858000 -1.199477000 2.081809000<br>Ge 1.423805000 -0.200287000 -1.532445000<br>Ge -2.015083000 -0.404235000 0.940908000<br>Bi -0.375858000 -2.198419000 -0.574563000   |  | <b>9.91</b><br><b>8.44</b> |
| <b>Sn<sub>6</sub>Sb<sub>2</sub><sup>4-</sup></b>                                    |                                                                                                                                                                                                                                                                                                                                                            |  |                            |
|  | Sn -1.558449935 -1.536133171 -2.082684193<br>Sn -2.306440199 -0.085592181 0.452427217<br>Sn -1.561041600 1.467732328 -2.074905180<br>Sn 1.407260093 -1.161571642 -2.242826615<br>Sn -0.165967605 2.280923538 0.519587037<br>Sn 0.326324310 -2.278955281 0.166230218<br>Sb 0.096261530 -0.123319474 2.071613884<br>Sb 1.327185323 1.723250381 -1.886039548  |  | <b>0.00</b><br><b>0.91</b> |
|  | Sn -2.243411500 0.000000000 0.450878500<br>Sn 0.021373500 -2.235127000 0.322436500<br>Sn 0.165914500 0.000000000 2.144210500<br>Sn 0.021373500 2.235127000 0.322436500<br>Sn -1.625954500 -1.500316000 -2.144210500<br>Sb 1.294125500 -1.423029000 -2.144210500<br>Sb 1.294125500 1.423029000 -2.144210500<br>Sn -1.625954500 1.500316000 -2.144210500     |  | <b>1.66</b><br><b>0.00</b> |
|  | Sn 1.368090850 -1.413652375 -2.183004093<br>Sn 0.095250583 -2.267241375 0.285814560<br>Sb -1.541488078 -1.436131375 -2.100925782<br>Sb 1.460863083 1.487791625 -2.058817311<br>Sn 0.037218192 -0.038427375 2.138448648<br>Sn -1.436338624 1.515701625 -2.2111047404<br>Sn 0.040731690 2.260313625 0.363641936<br>Sn -2.280942771 0.134656625 0.410142849   |  | <b>2.57</b><br><b>1.97</b> |
|                                                                                     | Sn 0.639054000 1.876467000 1.480849000<br>Sn 0.639054000 1.876467000 -1.480849000<br>Sn -1.956491000 0.297839000 -1.480300000<br>Sn -1.956491000 0.297839000 1.480300000                                                                                                                                                                                   |  | <b>5.60</b>                |



|                                                                                     |                                                                                                                                                                                                                                                                                                                                                            |                            |
|-------------------------------------------------------------------------------------|------------------------------------------------------------------------------------------------------------------------------------------------------------------------------------------------------------------------------------------------------------------------------------------------------------------------------------------------------------|----------------------------|
| 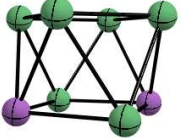   | Sb 0.639054000 -1.054780000 -2.038039000<br>Sn -1.176743000 -2.216340000 -0.000000000<br>Sb 0.639054000 -1.054780000 2.038039000<br>Sn 2.507946000 0.019478000 0.000000000                                                                                                                                                                                 | <b>1.82</b>                |
|    | Sn -1.965693000 -1.042013000 -1.145325000<br>Sb -0.808312000 -1.648356000 1.499794000<br>Sn -1.963028000 1.045831000 1.145686000<br>Sn 0.810873000 -2.155999000 -0.954634000<br>Sn 0.816111000 2.153535000 0.954954000<br>Sb -0.805472000 1.650683000 -1.499049000<br>Sn 1.973828000 0.527342000 -1.380877000<br>Sn 1.973968000 -0.531069000 1.379437000   | <b>6.24</b><br><b>1.93</b> |
|    | Sn 2.230061000 -0.788487000 -1.339469000<br>Sb 1.255412000 1.945351000 -1.178475000<br>Sb 0.532924000 1.695088000 1.560060000<br>Sn 1.606032000 -1.078614000 1.527736000<br>Sn -2.520341000 -0.788046000 -1.032138000<br>Sn -1.589254000 1.899908000 -0.573014000<br>Sn -0.109627000 -2.366730000 -0.628400000<br>Sn -1.440973000 -0.591278000 1.656069000 | <b>8.81</b><br><b>8.03</b> |
|    | Sb -1.352833000 -1.426615000 -1.387933000<br>Sn 1.743557000 1.396962000 -1.102623000<br>Sn 1.600515000 -1.555400000 -1.101904000<br>Sb -1.206017000 1.553085000 -1.382772000<br>Sn -0.291141000 -2.092152000 1.259397000<br>Sn -2.297323000 0.109336000 1.019769000<br>Sn -0.085654000 2.105987000 1.263136000<br>Sn 1.940073000 -0.093733000 1.488346000  | <b>8.92</b><br><b>5.20</b> |
| <b>Sn<sub>6</sub>Bi<sub>2</sub><sup>4-</sup></b>                                    |                                                                                                                                                                                                                                                                                                                                                            |                            |
|   | Sn 0.191941746 2.324231794 0.124467063<br>Sn 1.375049418 1.270595005 -2.265157228<br>Sn -1.595384741 1.465158760 -2.162856194<br>Bi 0.062345966 0.127690755 2.117279416<br>Sn -1.505685078 -1.545384855 -2.120420675<br>Sn -2.335442934 -0.000512625 0.360141375<br>Sn -0.152854990 -2.323822660 0.478720423<br>Bi 1.476636536 -1.701131931 -1.920683568   | <b>0.00</b><br><b>0.10</b> |
|  | Sn 0.182759069 2.296512595 0.383426843<br>Sn 1.345317048 1.525203966 -2.121316746<br>Sn -1.624719144 1.690173581 -1.968118531<br>Bi 0.084115436 -0.111031294 2.117465636<br>Sn -1.520997836 -1.305465296 -2.265791625<br>Sn -2.331485169 -0.054279346 0.381085854<br>Sn -0.137309616 -2.363762537 0.215551351<br>Bi 1.463938189 -1.465787076 -2.114635643  | <b>0.04</b><br><b>0.00</b> |
|  | Sn 0.253747667 0.000000000 -2.200843833<br>Bi 0.978436667 2.338244000 -0.528653833<br>Bi 0.978436667 -2.338244000 -0.528653833<br>Sn -1.881689333 1.516765000 -0.528653833<br>Sn 0.628414667 1.422890000 2.267934167<br>Sn 0.628414667 -1.422890000 2.267934167<br>Sn -1.881689333 -1.516765000 -0.528653833<br>Sn -2.018072333 0.000000000 2.066663167    | <b>0.18</b><br><b>0.85</b> |
|  | Sn 0.186388799 0.000000000 2.146308293<br>Sn -0.034387901 2.261558000 0.351806110<br>Sn -2.248812832 0.000000000 0.501583366<br>Sn -0.034387901 -2.261558000 0.351806110<br>Bi 1.315023601 1.507883000 -2.186067815<br>Sn -1.687801199 1.497502000 -2.106548771<br>Sn -1.687801199 -1.497502000 -2.106548771<br>Bi 1.315023601 -1.507883000 -2.186067815   | <b>1.09</b><br><b>0.92</b> |
|                                                                                     | Sn -0.011786355 -0.122789722 2.146042384<br>Sn -0.098758768 2.247593014 0.479518169<br>Sn -2.304015224 -0.002940032 0.376878488<br>Sn 0.212539280 -2.264033613 0.207556247                                                                                                                                                                                 | <b>2.07</b>                |



|                                                                                     |                                                                                                                                                                                                                                                                                                                                                           |  |                            |
|-------------------------------------------------------------------------------------|-----------------------------------------------------------------------------------------------------------------------------------------------------------------------------------------------------------------------------------------------------------------------------------------------------------------------------------------------------------|--|----------------------------|
| 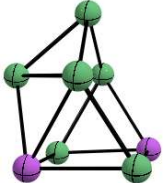   | Bi 1.484420928 1.676675541 -1.987266205<br>Sn -1.505062705 1.585179060 -2.134893696<br>Sn 1.523584724 -1.314661222 -2.203376508<br>Bi -1.455797525 -1.456034491 -2.258633127                                                                                                                                                                              |  | <b>1.97</b>                |
|    | Sn 1.081299000 -2.210459000 0.000000000<br>Sn -1.461470000 -1.527740000 1.477797000<br>Sn -1.461470000 -1.527740000 -1.477797000<br>Bi 1.108833000 -0.000468000 -2.110772000<br>Bi 1.108833000 -0.000468000 2.110772000<br>Sn -1.461470000 1.529451000 -1.478246000<br>Sn 1.083256000 2.208590000 -0.000000000<br>Sn -1.461470000 1.529451000 1.478246000 |  | <b>5.01</b><br><b>1.67</b> |
|    | Sn -2.294483000 -0.538619000 0.936647000<br>Bi 0.412960000 2.291222000 -0.723828000<br>Sn -1.537471000 0.259748000 -1.862158000<br>Sn -0.412960000 1.412621000 2.127065000<br>Sn 1.537471000 -0.259748000 -1.862158000<br>Bi -0.412960000 -2.291222000 -0.723828000<br>Sn 0.412960000 -1.412621000 2.127065000<br>Sn 2.294483000 0.538619000 0.936647000  |  | <b>5.80</b><br><b>2.17</b> |
|    | Sn 2.294035000 -0.539871000 0.937559000<br>Bi -0.411546000 2.290779000 -0.723447000<br>Sn 0.411546000 1.412897000 2.126346000<br>Sn 1.538277000 0.258557000 -1.862984000<br>Sn -0.411546000 -1.412897000 2.126346000<br>Bi 0.411546000 -2.290779000 -0.723447000<br>Sn -1.538277000 -0.258557000 -1.862984000<br>Sn -2.294035000 0.539871000 0.937559000  |  | <b>5.80</b><br><b>2.09</b> |
|   | Sn 1.905017000 0.766712000 -1.520989000<br>Bi -2.055590000 -0.797266000 -0.727472000<br>Sn -0.826928000 1.881871000 -1.513585000<br>Bi 0.898017000 -2.005969000 -0.733905000<br>Sn 0.996842000 2.418362000 0.791389000<br>Sn 2.144286000 -0.293987000 1.376877000<br>Sn -0.575350000 -1.413239000 1.906289000<br>Sn -1.722296000 1.293649000 1.385906000  |  | <b>7.48</b><br><b>3.04</b> |
|  | Bi 1.415093000 -0.721092000 1.574713000<br>Bi 2.130005000 0.152800000 -1.216808000<br>Sn 0.323440000 2.536458000 -1.022223000<br>Sn -0.357358000 1.766924000 1.750341000<br>Sn 0.418829000 -2.266675000 -0.893077000<br>Sn -2.315669000 -1.451912000 -1.325584000<br>Sn -2.289022000 1.364083000 -0.571359000<br>Sn -1.665084000 -1.005512000 1.467780000 |  | <b>7.53</b><br><b>6.81</b> |
|  | Sn 2.264963000 0.629432000 1.108704000<br>Bi 1.521014000 -0.253072000 -1.694006000<br>Sn 0.398394000 2.364868000 -0.504742000<br>Sn -0.398394000 1.457491000 2.208088000<br>Bi -1.521014000 0.253072000 -1.694006000<br>Sn 0.398394000 -1.457491000 2.208088000<br>Sn -0.398394000 -2.364868000 -0.504742000<br>Sn -2.264963000 -0.629432000 1.108704000  |  | <b>7.87</b><br><b>4.48</b> |
|  | Sn 1.730339000 -0.733922000 1.537275000<br>Bi -0.607789000 -2.187868000 -0.222781000<br>Sn 2.080395000 -1.602085000 -1.250738000<br>Sn 2.171706000 1.265269000 -1.008349000<br>Bi -2.365335000 0.203194000 -0.731372000<br>Sn -0.460120000 2.430208000 -1.235128000<br>Sn 0.653874000 2.092594000 1.509794000<br>Sn -1.240809000 -0.157505000 2.031039000 |  | <b>8.84</b><br><b>7.19</b> |

**Table S1.** Lower energy structures in the triplet state below 10 kcal·mol<sup>-1</sup> for the systems studied, with their respective coordinates. In addition the energy (kcal·mol<sup>-1</sup>) at the PBE0-D3/Def2TZVP (PCM,Solvent=Water) level and in bold DLPNO-CCSD(T) def2-QZVPP/C CPCM(water).

| <b>Si<sub>6</sub>Sb<sub>2</sub><sup>4-</sup></b>                                    |                 |              |              |                                                                                      |                 |              |              |
|-------------------------------------------------------------------------------------|-----------------|--------------|--------------|--------------------------------------------------------------------------------------|-----------------|--------------|--------------|
| 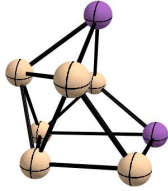   | Sb 1.935623000  | -0.917008000 | -0.011734000 |    | Sb -2.066244000 | 0.069899000  | 0.000229000  |
|                                                                                     | Si -0.072601000 | -0.762193000 | 1.689296000  |                                                                                      | Si 1.458962000  | -0.375831000 | 1.970721000  |
|                                                                                     | Sb -1.882502000 | -0.947028000 | -0.245140000 |                                                                                      | Si 1.087393000  | 1.892653000  | 1.259010000  |
|                                                                                     | Si 0.402853000  | 1.572127000  | 2.076015000  |                                                                                      | Si -0.907642000 | 2.357478000  | 0.002060000  |
|                                                                                     | Si -1.572733000 | 1.437671000  | 0.789370000  |                                                                                      | Sb 0.203609000  | -1.640418000 | 0.001932000  |
|                                                                                     | Si -0.941192000 | 1.141996000  | -1.693231000 |                                                                                      | Si 2.611828000  | 0.342246000  | -0.002173000 |
|                                                                                     | Si 1.480991000  | 0.912961000  | -1.732537000 |                                                                                      | Si 1.078685000  | 1.886296000  | -1.265665000 |
|                                                                                     | Si 0.509170000  | 2.487851000  | -0.193157000 |                                                                                      | Si 1.456090000  | -0.381666000 | -1.971827000 |
| <b>22.87</b>                                                                        |                 |              |              | <b>24.51</b>                                                                         |                 |              |              |
|    | Sb 2.073215000  | -0.692179000 | -0.178480000 |    | Sb -1.781305000 | -1.158504000 | -0.163265000 |
|                                                                                     | Si 0.071779000  | -1.645684000 | 1.221523000  |                                                                                      | Sb 1.782325000  | -1.157424000 | -0.163231000 |
|                                                                                     | Si -0.595723000 | 0.831677000  | -2.085964000 |                                                                                      | Si 1.253499000  | 0.628079000  | 1.731939000  |
|                                                                                     | Si 1.286471000  | 1.665967000  | -0.808104000 |                                                                                      | Si -1.254305000 | 0.627935000  | 1.731765000  |
|                                                                                     | Sb -1.842898000 | -0.779409000 | -0.310994000 |                                                                                      | Si -0.000881000 | 1.950261000  | -1.767279000 |
|                                                                                     | Si -1.224575000 | 1.984500000  | -0.071600000 |                                                                                      | Si 2.018766000  | 1.402141000  | -0.548348000 |
|                                                                                     | Si 0.562401000  | 2.175390000  | 1.461656000  |                                                                                      | Si -0.000611000 | 2.427431000  | 0.589446000  |
|                                                                                     | Si -0.939367000 | 0.348934000  | 2.065569000  |                                                                                      | Si -2.020186000 | 1.400747000  | -0.548145000 |
| <b>24.81</b>                                                                        |                 |              |              | <b>25.08</b>                                                                         |                 |              |              |
|    | Si 0.015578000  | 0.623192000  | -1.898160000 |    | Sb -2.022114000 | -0.738185000 | -0.032789000 |
|                                                                                     | Si 1.486096000  | -1.241437000 | -1.331543000 |                                                                                      | Si 0.701712000  | 0.268391000  | 1.899549000  |
|                                                                                     | Si -0.974566000 | -1.656290000 | -1.427597000 |                                                                                      | Si -1.337366000 | 1.437998000  | 1.250578000  |
|                                                                                     | Sb -1.644369000 | 1.035786000  | 0.088111000  |                                                                                      | Sb 1.393701000  | -1.333052000 | -0.108162000 |
|                                                                                     | Si 1.687742000  | 0.917824000  | 0.262109000  |                                                                                      | Si 2.457950000  | 1.038016000  | 0.418147000  |
|                                                                                     | Si 0.386143000  | -2.620039000 | 0.356626000  |                                                                                      | Si 0.485284000  | 2.512559000  | 0.025096000  |
|                                                                                     | Si -1.639578000 | -1.384678000 | 1.052325000  |                                                                                      | Si -1.180025000 | 1.436473000  | -1.360129000 |
|                                                                                     | Si 0.568327000  | -0.837467000 | 1.972546000  |                                                                                      | Si 1.161661000  | 0.851785000  | -1.719777000 |
| <b>25.09</b>                                                                        |                 |              |              | <b>25.16</b>                                                                         |                 |              |              |
|  | Sb 2.452186000  | -0.348392000 | 0.161452000  |                                                                                      |                 |              |              |
|                                                                                     | Si 0.407904000  | -1.447357000 | -1.145587000 |                                                                                      |                 |              |              |
|                                                                                     | Si 0.956355000  | 0.841522000  | -1.723847000 |                                                                                      |                 |              |              |
|                                                                                     | Si -0.407826000 | -1.447382000 | 1.145499000  |                                                                                      |                 |              |              |
|                                                                                     | Sb -2.452203000 | -0.348397000 | -0.161432000 |                                                                                      |                 |              |              |
|                                                                                     | Si -1.005904000 | 1.875020000  | -0.669720000 |                                                                                      |                 |              |              |
|                                                                                     | Si 1.005876000  | 1.875041000  | 0.669728000  |                                                                                      |                 |              |              |
|                                                                                     | Si -0.956344000 | 0.841459000  | 1.723851000  |                                                                                      |                 |              |              |
| <b>32.21</b>                                                                        |                 |              |              |                                                                                      |                 |              |              |
| <b>Si<sub>6</sub>Bi<sub>2</sub><sup>4-</sup></b>                                    |                 |              |              |                                                                                      |                 |              |              |
|  | Bi -1.733329000 | -0.568506000 | -0.001018000 |  | Bi 1.832017000  | -0.755271000 | -0.120629000 |
|                                                                                     | Bi 1.202423000  | -1.236597000 | -0.000355000 |                                                                                      | Si 1.487685000  | 1.796275000  | 0.820277000  |
|                                                                                     | Si 2.015621000  | 1.013538000  | 1.306432000  |                                                                                      | Si -0.569081000 | 1.997933000  | 1.992718000  |
|                                                                                     | Si -0.151571000 | 1.876264000  | 1.996646000  |                                                                                      | Si -0.016708000 | -0.328614000 | 1.878286000  |
|                                                                                     | Si -0.124296000 | 1.876333000  | -2.002667000 |                                                                                      | Si 1.013867000  | 1.425931000  | -1.696719000 |
|                                                                                     | Si 2.037192000  | 1.016167000  | -1.283263000 |                                                                                      | Si -0.489272000 | 2.881753000  | -0.302603000 |
|                                                                                     | Si 0.905151000  | 2.839236000  | 0.005304000  |                                                                                      | Bi -1.838809000 | -0.767081000 | -0.032488000 |
|                                                                                     | Si -1.534586000 | 2.080141000  | -0.014311000 |                                                                                      | Si -1.386227000 | 1.252098000  | -1.784191000 |
| <b>18.81</b>                                                                        |                 |              |              | <b>21.98</b>                                                                         |                 |              |              |
|  | Bi -1.945471000 | -0.063888000 | 0.000142000  |  | Bi -1.942784000 | -0.644466000 | -0.180255000 |
|                                                                                     | Si 0.943026000  | 2.345529000  | 1.261149000  |                                                                                      | Si -0.916290000 | 0.736582000  | 2.117953000  |
|                                                                                     | Si 0.939486000  | 2.342350000  | -1.263117000 |                                                                                      | Si -1.280339000 | 2.224573000  | -0.139447000 |
|                                                                                     | Si -1.099051000 | 2.446954000  | 0.000964000  |                                                                                      | Si 0.075496000  | -1.329524000 | 1.460082000  |
|                                                                                     | Si 1.762765000  | 0.209086000  | 1.986351000  |                                                                                      | Si 0.535453000  | 2.529382000  | 1.328311000  |
|                                                                                     | Si 2.739713000  | 1.127664000  | -0.001527000 |                                                                                      | Si 1.212326000  | 1.847490000  | -0.903054000 |
|                                                                                     | Si 1.760526000  | 0.206713000  | -1.987804000 |                                                                                      | Si -0.683657000 | 0.981622000  | -2.099337000 |
|                                                                                     | Bi 0.756911000  | -1.399922000 | 0.000530000  |                                                                                      | Bi 2.121075000  | -0.534591000 | -0.117373000 |
| <b>23.02</b>                                                                        |                 |              |              | <b>23.99</b>                                                                         |                 |              |              |
|  | Bi 2.195263000  | -0.851751000 | -0.204209000 |                                                                                      |                 |              |              |
|                                                                                     | Si 0.980911000  | -0.074298000 | 2.104226000  |                                                                                      |                 |              |              |
|                                                                                     | Bi -2.566108000 | -0.562240000 | -0.035063000 |                                                                                      |                 |              |              |
|                                                                                     | Si 2.068602000  | 1.681268000  | 0.864835000  |                                                                                      |                 |              |              |
|                                                                                     | Si -0.946333000 | 1.105501000  | 1.315976000  |                                                                                      |                 |              |              |
|                                                                                     | Si -1.134453000 | 1.342668000  | -1.321933000 |                                                                                      |                 |              |              |
|                                                                                     | Si 1.255103000  | 1.410108000  | -1.579306000 |                                                                                      |                 |              |              |
|                                                                                     | Si -0.025252000 | 2.917700000  | 0.034740000  |                                                                                      |                 |              |              |
| <b>24.59</b>                                                                        |                 |              |              |                                                                                      |                 |              |              |

### Ge<sub>6</sub>Sb<sub>2</sub><sup>4-</sup>

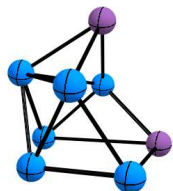

23.54

|    |              |              |              |
|----|--------------|--------------|--------------|
| Ge | 0.624961000  | 2.006460000  | 0.895817000  |
| Ge | 0.112385000  | 0.017557000  | 2.458101000  |
| Sb | 1.946199000  | -1.406457000 | -0.367135000 |
| Ge | 1.933804000  | 1.085622000  | -1.127932000 |
| Ge | -1.790225000 | 0.759888000  | 0.935579000  |
| Ge | -0.436591000 | -1.893333000 | 0.821643000  |
| Ge | -0.587240000 | 1.602121000  | -1.411167000 |
| Sb | -1.856533000 | -0.838760000 | -1.246695000 |

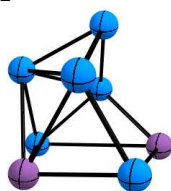

24.58

|    |              |              |              |
|----|--------------|--------------|--------------|
| Sb | -1.738862000 | -1.617438000 | 0.439387000  |
| Ge | -1.974164000 | 0.991884000  | 0.334711000  |
| Ge | 0.771415000  | -2.206962000 | -0.350881000 |
| Ge | -0.059682000 | 1.233248000  | 2.075486000  |
| Ge | -0.956521000 | 1.034995000  | -2.046861000 |
| Ge | 1.279786000  | -0.241268000 | -1.865222000 |
| Sb | 1.983035000  | -0.184203000 | 0.905622000  |
| Ge | 0.550014000  | 2.059469000  | -0.290841000 |

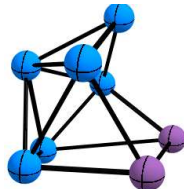

26.60

|    |              |              |              |
|----|--------------|--------------|--------------|
| Ge | 0.292008000  | -1.095355000 | -2.125670000 |
| Ge | -1.842660000 | 0.157074000  | -1.369742000 |
| Ge | 1.738243000  | -1.437409000 | 0.004680000  |
| Ge | -0.941542000 | -1.975746000 | -0.001412000 |
| Sb | -0.611012000 | 2.127604000  | -0.000514000 |
| Sb | 2.067385000  | 1.189416000  | 0.001363000  |
| Ge | 0.283758000  | -1.091626000 | 2.128394000  |
| Ge | -1.850902000 | 0.156559000  | 1.362396000  |

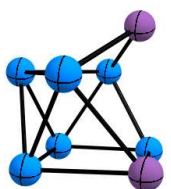

26.76

|    |              |              |              |
|----|--------------|--------------|--------------|
| Sb | 0.744867000  | 2.143218000  | 0.263840000  |
| Ge | 2.271362000  | -0.000477000 | 0.472876000  |
| Ge | 0.915853000  | -0.249751000 | -1.986176000 |
| Ge | -1.271504000 | 1.254768000  | -1.279882000 |
| Ge | 0.431083000  | -0.962739000 | 2.031718000  |
| Ge | 0.946998000  | -2.145637000 | -0.219934000 |
| Ge | -1.340693000 | -1.361103000 | -1.203856000 |
| Sb | -1.970341000 | 0.030861000  | 1.107300000  |

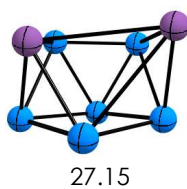

27.15

|    |              |              |              |
|----|--------------|--------------|--------------|
| Sb | -2.273221000 | -1.158221000 | -0.309042000 |
| Ge | -1.430797000 | 1.280315000  | -1.198826000 |
| Ge | 1.079902000  | 0.809599000  | -1.730560000 |
| Sb | 1.351276000  | -1.710857000 | -0.604355000 |
| Ge | -1.522743000 | 0.662316000  | 1.505845000  |
| Ge | 0.356559000  | 2.166575000  | 0.443798000  |
| Ge | 2.416823000  | 0.475924000  | 0.586270000  |
| Ge | 0.569606000  | -0.822138000 | 1.849200000  |

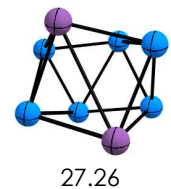

27.26

|    |              |              |              |
|----|--------------|--------------|--------------|
| Ge | 2.040075000  | 1.115985000  | 0.323227000  |
| Sb | 1.580555000  | -1.311047000 | -0.816897000 |
| Ge | 0.174572000  | 1.682457000  | -1.444364000 |
| Ge | -0.174698000 | 1.681523000  | 1.445425000  |
| Ge | 0.869559000  | -0.708663000 | 1.897808000  |
| Ge | -0.869442000 | -0.707443000 | -1.898385000 |
| Ge | -2.040166000 | 1.115922000  | -0.322614000 |
| Sb | -1.580492000 | -1.311561000 | 0.816209000  |

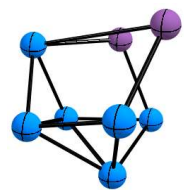

30.14

|    |              |              |              |
|----|--------------|--------------|--------------|
| Ge | -0.237953000 | -0.931456000 | -2.165133000 |
| Sb | 1.253375000  | -1.611735000 | -0.001485000 |
| Ge | -1.743175000 | -1.348609000 | -0.001320000 |
| Ge | -1.734239000 | 0.933553000  | -1.341455000 |
| Sb | 2.325019000  | 0.997050000  | 0.001023000  |
| Ge | -0.238699000 | -0.937333000 | 2.162981000  |
| Ge | -1.732482000 | 0.931463000  | 1.343969000  |
| Ge | -0.016517000 | 2.332035000  | 0.001693000  |

### Ge<sub>6</sub>Bi<sub>2</sub><sup>4-</sup>

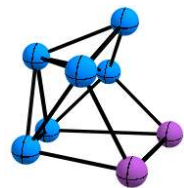

16.58

|    |              |              |              |
|----|--------------|--------------|--------------|
| Ge | -0.946267000 | 1.074951000  | 2.123729000  |
| Ge | -1.506832000 | -1.340794000 | 1.368485000  |
| Ge | -2.438134000 | 0.776278000  | -0.000199000 |
| Bi | 0.862163000  | -1.888294000 | -0.000633000 |
| Bi | 2.056743000  | 0.872781000  | 0.000383000  |
| Ge | -0.227362000 | 2.384577000  | 0.001154000  |
| Ge | -1.506878000 | -1.338619000 | -1.369458000 |
| Ge | -0.945440000 | 1.077592000  | -2.123064000 |

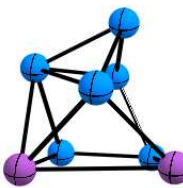

19.19

|    |              |              |              |
|----|--------------|--------------|--------------|
| Bi | -2.211367000 | -0.864389000 | -0.279739000 |
| Ge | 0.529356000  | 0.931708000  | -2.189558000 |
| Ge | -0.060787000 | -2.006726000 | 1.052639000  |
| Ge | -1.424567000 | 1.705032000  | -0.694131000 |
| Bi | 1.919596000  | -0.909844000 | -0.515614000 |
| Ge | 1.017389000  | 0.000574000  | 2.133958000  |
| Ge | 1.277376000  | 1.988093000  | 0.026982000  |
| Ge | -0.581986000 | 1.983236000  | 1.733055000  |

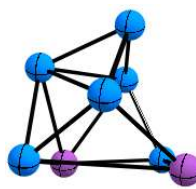

20.43

|    |              |              |              |
|----|--------------|--------------|--------------|
| Bi | -2.211367000 | -0.864389000 | -0.279739000 |
| Ge | 0.529356000  | 0.931708000  | -2.189558000 |
| Ge | -0.060787000 | -2.006726000 | 1.052639000  |
| Ge | -1.424567000 | 1.705032000  | -0.694131000 |
| Bi | 1.919596000  | -0.909844000 | -0.515614000 |
| Ge | 1.017389000  | 0.000574000  | 2.133958000  |
| Ge | 1.277376000  | 1.988093000  | 0.026982000  |
| Ge | -0.581986000 | 1.983236000  | 1.733055000  |

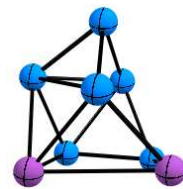

21.84

|    |              |              |              |
|----|--------------|--------------|--------------|
| Ge | -0.935892000 | 0.165755000  | -2.128782000 |
| Ge | 1.427427000  | 1.153082000  | -1.796363000 |
| Bi | 2.220243000  | -0.313353000 | 0.393140000  |
| Bi | -0.910398000 | -1.911902000 | -0.218887000 |
| Ge | -0.046950000 | -0.323209000 | 2.049160000  |
| Ge | -2.362661000 | 0.509411000  | 0.140764000  |
| Ge | -0.390521000 | 2.338701000  | -0.548467000 |
| Ge | -1.088813000 | 1.928014000  | 1.831718000  |

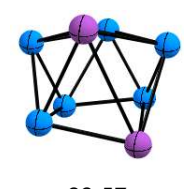

22.57

|    |              |              |              |
|----|--------------|--------------|--------------|
| Ge | -1.877949000 | -1.378705000 | 0.910878000  |
| Ge | -0.566490000 | -1.952965000 | -1.317947000 |
| Ge | 0.566429000  | -1.952766000 | 1.318227000  |
| Bi | -1.787280000 | 1.136381000  | -0.336861000 |
| Ge | 0.280039000  | 0.383994000  | -2.133746000 |
| Ge | 1.877897000  | -1.378838000 | -0.910717000 |
| Ge | -0.280114000 | 0.384376000  | 2.133619000  |
| Bi | 1.787352000  | 1.136353000  | 0.336740000  |

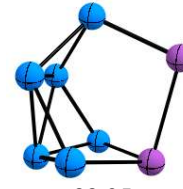

22.85

|    |              |              |              |
|----|--------------|--------------|--------------|
| Ge | 0.971628000  | -2.407128000 | -0.001056000 |
| Ge | -1.097823000 | -1.793212000 | 1.363641000  |
| Ge | -2.606864000 | -0.000061000 | 0.001105000  |
| Ge | -1.108464000 | -1.799489000 | -1.354889000 |
| Bi | 2.355662000  | -0.085293000 | -0.000544000 |
| Ge | -1.271684000 | 0.644336000  | 2.087128000  |
| Ge | -1.272556000 | 0.636035000  | -2.088135000 |
| Bi | 0.106319000  | 1.904867000  | -0.002461000 |

**Sn<sub>6</sub>Sb<sub>2</sub><sup>4-</sup>**

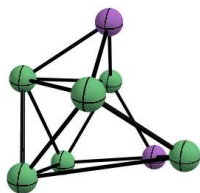

15.51

|    |              |              |              |
|----|--------------|--------------|--------------|
| Sn | 1.079733000  | 0.382396000  | 2.374570000  |
| Sn | 0.805901000  | 2.169692000  | 0.036539000  |
| Sn | -1.665016000 | 1.011685000  | 1.537999000  |
| Sn | 0.274604000  | -2.813281000 | -0.030018000 |
| Sn | -1.676316000 | 0.965265000  | -1.547205000 |
| Sn | 2.338361000  | -0.764648000 | -0.019570000 |
| Sb | 1.074717000  | 0.477776000  | -2.319351000 |
| Sb | -2.209292000 | -1.410236000 | 0.013160000  |

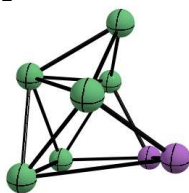

17.29

|    |              |              |              |
|----|--------------|--------------|--------------|
| Sn | -0.415709000 | -0.000870000 | 2.157091000  |
| Sn | -2.459738000 | 0.001432000  | -0.217570000 |
| Sn | -0.952545000 | -2.446845000 | 0.540925000  |
| Sn | 1.862830000  | -1.546455000 | 0.682687000  |
| Sn | -0.948909000 | 2.447205000  | 0.543816000  |
| Sb | -0.848972000 | 0.002452000  | -2.549370000 |
| Sb | 1.877625000  | -0.000073000 | -1.756386000 |
| Sn | 1.864844000  | 1.543107000  | 0.684923000  |

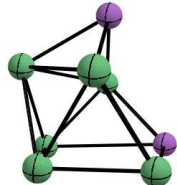

18.56

|    |              |              |              |
|----|--------------|--------------|--------------|
| Sn | -2.579632000 | -0.649251000 | -0.596494000 |
| Sb | -1.788409000 | 2.023005000  | -0.808135000 |
| Sb | 1.812110000  | -0.188907000 | -1.974732000 |
| Sn | -0.044714000 | -2.213040000 | -1.060388000 |
| Sn | 0.324470000  | 1.147135000  | 2.308146000  |
| Sn | 1.085663000  | 2.130621000  | -0.400073000 |
| Sn | -0.850533000 | -1.468505000 | 1.731016000  |
| Sn | 2.040570000  | -0.817739000 | 0.856317000  |

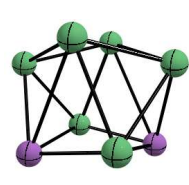

21.43

|    |              |              |              |
|----|--------------|--------------|--------------|
| Sn | -0.328312000 | -1.706151000 | 1.631607000  |
| Sn | -2.320753000 | -1.016515000 | -0.415343000 |
| Sn | 0.317911000  | -1.693002000 | -1.644719000 |
| Sn | 2.313475000  | -1.031982000 | 0.409424000  |
| Sb | -1.356197000 | 1.551158000  | -1.405916000 |
| Sn | 1.543362000  | 1.150895000  | -1.545182000 |
| Sb | 1.365812000  | 1.535540000  | 1.416259000  |
| Sn | -1.535491000 | 1.148325000  | 1.553664000  |

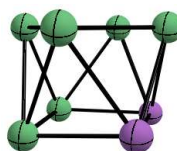

22.39

|    |              |              |              |
|----|--------------|--------------|--------------|
| Sb | 2.436462000  | -1.093436000 | -1.209089000 |
| Sn | -1.148630000 | 1.712342000  | -1.268707000 |
| Sn | 1.777894000  | 1.662746000  | -0.662463000 |
| Sb | -1.663252000 | -1.145968000 | -1.638438000 |
| Sn | 1.881110000  | -0.570743000 | 1.535623000  |
| Sn | -0.512643000 | -2.163010000 | 0.826708000  |
| Sn | -2.604612000 | -0.019541000 | 0.854190000  |
| Sn | -0.181792000 | 1.662399000  | 1.619126000  |

**Sn<sub>6</sub>Bi<sub>2</sub><sup>4-</sup>**

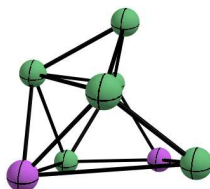

14.27

|    |              |              |              |
|----|--------------|--------------|--------------|
| Sn | -0.272052000 | 2.794115000  | 0.470688000  |
| Sn | 1.493695000  | 1.485030000  | -1.482692000 |
| Sn | -1.578555000 | 1.037955000  | -1.508454000 |
| Sn | -1.699941000 | 0.588360000  | 1.773194000  |
| Bi | 2.480931000  | -0.762170000 | 0.223223000  |
| Sn | 0.455803000  | -1.371670000 | -1.893303000 |
| Sn | 0.816629000  | -0.573411000 | 2.647288000  |
| Bi | -2.008389000 | -1.623601000 | -0.227271000 |

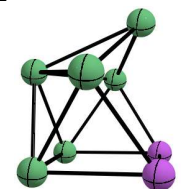

16.26

|    |              |              |              |
|----|--------------|--------------|--------------|
| Sn | -0.679264000 | -2.709951000 | 0.000000000  |
| Sn | -0.740964000 | -0.952825000 | 2.321023000  |
| Sn | -2.523123000 | 0.029755000  | 0.000000000  |
| Sn | -0.740964000 | -0.952825000 | -2.321023000 |
| Bi | 1.857302000  | 0.204267000  | 1.501998000  |
| Sn | -0.740964000 | 1.953840000  | 1.481807000  |
| Sn | -0.740964000 | 1.953840000  | -1.481807000 |
| Bi | 1.857302000  | 0.204267000  | -1.501998000 |

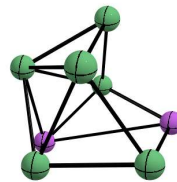

16.47

|    |              |              |              |
|----|--------------|--------------|--------------|
| Sn | 0.102777000  | -2.104625000 | 0.967447000  |
| Bi | -2.386282000 | -1.253018000 | -0.499107000 |
| Bi | 2.080853000  | -1.228028000 | -1.085201000 |
| Sn | -0.600846000 | 0.225836000  | 2.671504000  |
| Sn | -1.825063000 | 1.353598000  | -1.550439000 |
| Sn | 1.183631000  | 1.587167000  | -1.576534000 |
| Sn | 2.023875000  | 0.572870000  | 1.296334000  |
| Sn | -0.377362000 | 2.483691000  | 0.821639000  |

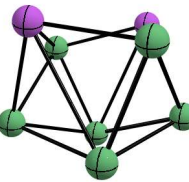

18.93

|    |              |              |              |
|----|--------------|--------------|--------------|
| Sn | 1.959103000  | 1.366247000  | 1.229824000  |
| Bi | 1.959103000  | -0.001774000 | -1.421605000 |
| Sn | -0.059641000 | 2.281345000  | -0.832920000 |
| Sn | -0.883277000 | 1.354789000  | 1.962960000  |
| Bi | -1.959103000 | 0.001774000  | -1.421605000 |
| Sn | 0.883277000  | -1.354789000 | 1.962960000  |
| Sn | 0.059641000  | -2.281345000 | -0.832920000 |
| Sn | -1.959103000 | -1.366247000 | 1.229824000  |

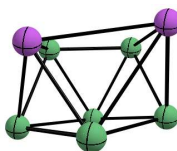

19.34

|    |              |              |              |
|----|--------------|--------------|--------------|
| Sn | 1.254884000  | 0.951278000  | -1.922268000 |
| Bi | -2.335611000 | -1.315811000 | -0.386876000 |
| Sn | -1.659532000 | 1.423063000  | -1.372957000 |
| Bi | 1.502246000  | -1.792230000 | -0.657570000 |
| Sn | 0.386155000  | 2.484196000  | 0.554008000  |
| Sn | 2.717077000  | 0.542897000  | 0.747638000  |
| Sn | 0.529653000  | -0.987716000 | 2.065567000  |
| Sn | -1.844851000 | 0.745629000  | 1.661793000  |

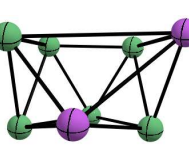

19.60

|    |              |              |              |
|----|--------------|--------------|--------------|
| Sn | 2.605783000  | -0.112836000 | 0.763378000  |
| Bi | 0.508832000  | -2.254600000 | 0.507698000  |
| Sn | 1.795801000  | -1.014026000 | -1.912195000 |
| Sn | 1.414626000  | 1.848852000  | -1.356228000 |
| Bi | -2.813865000 | -0.547022000 | -0.718456000 |
| Sn | -1.440537000 | 2.039442000  | -0.495085000 |
| Sn | 0.715098000  | 2.109360000  | 1.566605000  |
| Sn | -1.264416000 | -0.220099000 | 1.783383000  |

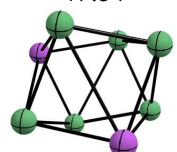

22.85

|    |              |              |              |
|----|--------------|--------------|--------------|
| Sn | -0.647612000 | -0.223811000 | -2.364665000 |
| Bi | 2.038163000  | -1.348005000 | -0.057287000 |
| Sn | -0.805792000 | -2.314634000 | -0.161748000 |
| Sn | 1.719454000  | 1.328502000  | -1.455879000 |
| Sn | -0.691729000 | -0.540835000 | 2.326810000  |
| Bi | -2.482511000 | 0.201759000  | 0.004295000  |
| Sn | -0.479615000 | 2.486989000  | 0.095023000  |
| Sn | 1.642910000  | 1.166559000  | 1.648424000  |
